# Supplementary material
Source: publisher site journal article supplement (https://www.dovepress.com/get_supplementary_file.php?f=463694.docx)
Supplement: Supplementary file 1 [file get_supplementary_file.php]

**Supplementary Table 1. The name of 97 invasion-related genes (IRGs)**

| 97 invasion-related genes (IRGs) | *AEBP1 AKR1B1 AMD1 SLC25A5 ATP5F1 BAG1 BGN C1QB CALD1 CAPG CCNE1 CDH11 CKS1B CKS2 COL1A1 COL1A2 COL3A1 COL5A1 COL5A2 COL6A2 COL6A3 COL10A1 COL11A1 COMP CSE1L VCAN CTSK DAB2 DDX5 EDNRA FAP FBN1 FN1 GNAS H2AFZ HMGB2 HNRNPU HSD17B4 CYR61 INHBA LAMB1 LAMC1 LGALS1 LOX LOXL2 LUM MMP2 MMP11 HNRNPM NDUFB7 YBX1 PDGFRB PLAU PRRX1 PNN PPIC PROS1 PSMA2 PSMB4 RGS4 SNAI2 SPOCK1 TGFBI THBS2 THY1 TNFAIP6 UBE2V2 ADAM12 MFAP5 ITGBL1 TP53I3 NUAK1 HNRNPDL TXNDC9 LRRC17 IFI30 POSTN CBX1 NID2 RRAS2 RALY SEPHS2 HEY1 MXRA5 OLFML2B TMEM158 WWTR1 GREM1 NOX4 CLEC4A COPZ2 ASPN CEMIP CRISPLD2 TUBB6 LRRC15 TUBB* |
| --- | --- |

**Supplementary Table 2. The results for multivariate Cox analysis**

|  | p.value | HR | HR.95L | HR.95H | Indicator |
| --- | --- | --- | --- | --- | --- |
| riskScore | 0.002321593 | 4.200136844 | 1.667932783 | 10.57665494 | riskScore |
| Age (>=40 vs <40) | 0.520488631 | 1.547897775 | 0.408330136 | 5.867770489 | Age (>=40 vs <40) |
| Grade (G3 vs G2) | 0.280720267 | 0.467325347 | 0.117308526 | 1.861697406 | Grade (G3 vs G2) |
| IDH1 Mutation (YES vs NO) | 0.910059967 | 0.913009249 | 0.188234547 | 4.428442616 | IDH1 Mutation (YES vs NO) |

**Supplementary Table 3. The results for different immune checkpoints**

* p<0.05, ** p<0.01,***p<0.001,****p<0.0001

| gene | .y. | group1 | group2 | n1 | n2 | statistic | p | p.adj | p.adj.signif |
| --- | --- | --- | --- | --- | --- | --- | --- | --- | --- |
| ADORA2A | expr | High Risk | Low Risk | 262 | 262 | 27541 | 9.13E-05 | 0.00013695 | *** |
| BTLA | expr | High Risk | Low Risk | 262 | 262 | 42782 | 1.05E-06 | 1.95E-06 | **** |
| CD160 | expr | High Risk | Low Risk | 262 | 262 | 42674 | 1.44E-06 | 2.55E-06 | **** |
| CD200 | expr | High Risk | Low Risk | 262 | 262 | 26619 | 8.80E-06 | 1.49E-05 | **** |
| CD200R1 | expr | High Risk | Low Risk | 262 | 262 | 45861 | 2.77E-11 | 7.72E-11 | **** |
| CD244 | expr | High Risk | Low Risk | 262 | 262 | 43080 | 4.34E-07 | 8.46E-07 | **** |
| CD27 | expr | High Risk | Low Risk | 262 | 262 | 38148 | 0.0273 | 0.03549 | * |
| CD28 | expr | High Risk | Low Risk | 262 | 262 | 44461 | 4.90E-09 | 1.06E-08 | **** |
| CD40 | expr | High Risk | Low Risk | 262 | 262 | 51207 | 1.97E-22 | 1.92E-21 | **** |
| CD40LG | expr | High Risk | Low Risk | 262 | 262 | 47265 | 6.45E-14 | 2.10E-13 | **** |
| CD44 | expr | High Risk | Low Risk | 262 | 262 | 51516 | 3.36E-23 | 6.55E-22 | **** |
| CD48 | expr | High Risk | Low Risk | 262 | 262 | 49849 | 3.26E-19 | 1.82E-18 | **** |
| CD70 | expr | High Risk | Low Risk | 262 | 262 | 45825.5 | 2.61E-11 | 7.72E-11 | **** |
| CD80 | expr | High Risk | Low Risk | 262 | 262 | 49493.5 | 1.96E-18 | 9.56E-18 | **** |
| CD86 | expr | High Risk | Low Risk | 262 | 262 | 47642 | 1.52E-14 | 5.39E-14 | **** |
| CTLA4 | expr | High Risk | Low Risk | 262 | 262 | 45036 | 6.32E-10 | 1.54E-09 | **** |
| ICOS | expr | High Risk | Low Risk | 262 | 262 | 48704 | 3.41E-17 | 1.33E-16 | **** |
| ICOSLG | expr | High Risk | Low Risk | 262 | 262 | 41334 | 5.21E-05 | 8.47E-05 | **** |
| IDO1 | expr | High Risk | Low Risk | 262 | 262 | 50155 | 1.42E-20 | 9.82E-20 | **** |
| LAG3 | expr | High Risk | Low Risk | 262 | 262 | 38150 | 0.0272 | 0.03549 | * |
| LAIR1 | expr | High Risk | Low Risk | 262 | 262 | 50426 | 1.51E-20 | 9.82E-20 | **** |
| LGALS9 | expr | High Risk | Low Risk | 262 | 262 | 49113 | 1.40E-17 | 6.07E-17 | **** |
| NRP1 | expr | High Risk | Low Risk | 262 | 262 | 44397 | 6.12E-09 | 1.26E-08 | **** |
| TNFRSF14 | expr | High Risk | Low Risk | 262 | 262 | 51421 | 5.81E-23 | 7.55E-22 | **** |
| TNFRSF18 | expr | High Risk | Low Risk | 262 | 262 | 44806 | 1.45E-09 | 3.33E-09 | **** |
| TNFRSF8 | expr | High Risk | Low Risk | 262 | 262 | 41165 | 7.87E-05 | 0.000122772 | *** |
| TNFRSF9 | expr | High Risk | Low Risk | 262 | 262 | 45762.5 | 4.07E-11 | 1.06E-10 | **** |
| TNFSF14 | expr | High Risk | Low Risk | 262 | 262 | 53951.5 | 9.66E-30 | 3.77E-28 | **** |
| TNFSF15 | expr | High Risk | Low Risk | 262 | 262 | 38474 | 0.0166 | 0.023121429 | * |
| TNFSF4 | expr | High Risk | Low Risk | 262 | 262 | 38585 | 0.0139 | 0.020077778 | * |
